# Supplementary material
Source: PubMed Central journal article supplement (PMC6456926)
Supplement: en.2018-00257.sd1.pdf [file en.2018-00257.sd1.pdf]

**Supplemental Table 1. Characteristics of human donors**

| <b>Subject</b> | <b>Gender</b> | <b>Age</b> | <b>Ethnicity</b> | <b>BMI</b> | <b>Tissue location</b> |
|----------------|---------------|------------|------------------|------------|------------------------|
| 7              | F             | 21         | African American | 25         | Hips                   |
| 13             | F             | 31         | African American | 37.16      | Abdomen, flanks        |

**Supplemental Table 2. Primer sequences for real-time qPCR analysis**

---

| <b>Gene</b>          | <b>Forward primers (5' - 3')</b> | <b>Reverse primers (5' - 3')</b> |
|----------------------|----------------------------------|----------------------------------|
| <i>m36B4 (Rplp0)</i> | GAGACTGAGTACACCTTCCCAC           | ATGCAGATGGATCAGCCAGG             |
| <i>mFgf21</i>        | GTGTCAAAGCCTCTAGGTTTCTT          | GGTACACATTGTAACCGTCCTC           |
| <i>mHdac3</i>        | GCCAAGACCGTGGCGTATT              | GTCCAGCTCCATAGTGGAAGT            |
| <i>mPparg1a</i>      | TATGGAGTGACATAGAGTGTGCT          | CCACTTCAATCCACCCAGAAAG           |
| <i>mPrdm16</i>       | GCACGGTGAAGCCATTCATATG           | TCGGCGTGCATCCGCTTGTG             |
| <i>mUcp1</i>         | CTTTGCCTCACTCAGGATTGG            | ACTGCCACACCTCCAGTCATT            |
| <i>hRPLP0</i>        | GCAGCATCTACAACCCTGAAG            | CACTGGCAACATTGCGGAC              |
| <i>hFGF21</i>        | ATGGATCGCTCCACTTTGACC            | GGGCTTCGGACTGGTAAACAT            |
| <i>hPPARGC1A</i>     | TCTGAGTCTGTATGGAGTGACAT          | CCAAGTCGTTACATCTAGTTCA           |
| <i>hUCP1</i>         | AGGTCCAAGGTGAATGCCC              | GCGGTGATTGTTCCCAGGA              |

---

129SVE

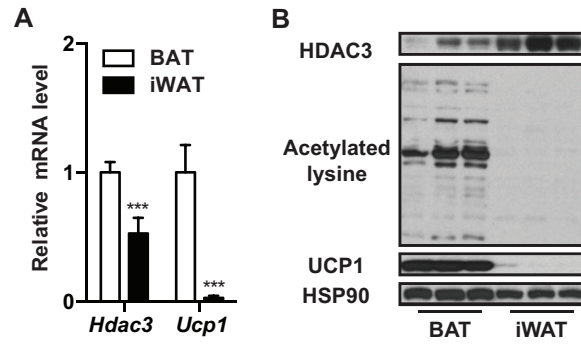

**Supplemental Figure 1.** HDAC3 protein levels are lower in BAT compared to iWAT in 129SVE mice. (A, B) Real-time qPCR analyses of *Hdac3* and *Ucp1* (A, n=6) and representative immunoblots of HDAC3, acetylated lysine, UCP1 and HSP90 as a loading control (B) in BAT and iWAT isolated from 129SVE mice housed at room temperature. Data are presented as mean  $\pm$  SEM; \*\*\* $P$ <0.001.

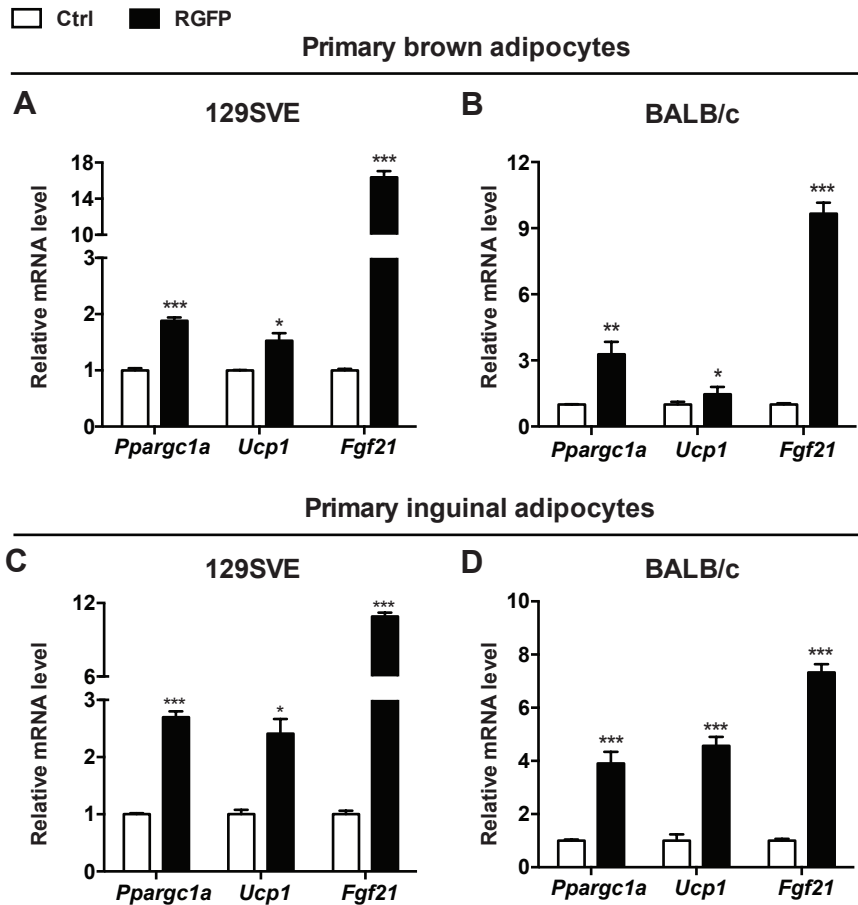

**Supplemental Figure 2:** Pharmacological inhibition of HDAC3 promotes thermogenesis in primary adipocytes of multiple inbred wild type mouse strains. (A-D) Real-time qPCR analyses of thermogenic markers after treatment with vehicle control or 50  $\mu$ M RGFP for 6 h in differentiated primary brown adipocytes isolated from 129SVE mice (A) or from BALB/c mice (B), and in differentiated primary inguinal adipocytes isolated from 129SVE mice (C) or from BALB/c mice (D). Data are presented as mean  $\pm$  SEM;  $n=3$ , \* $P<0.05$ , \*\* $P<0.01$ , \*\*\* $P<0.001$ .

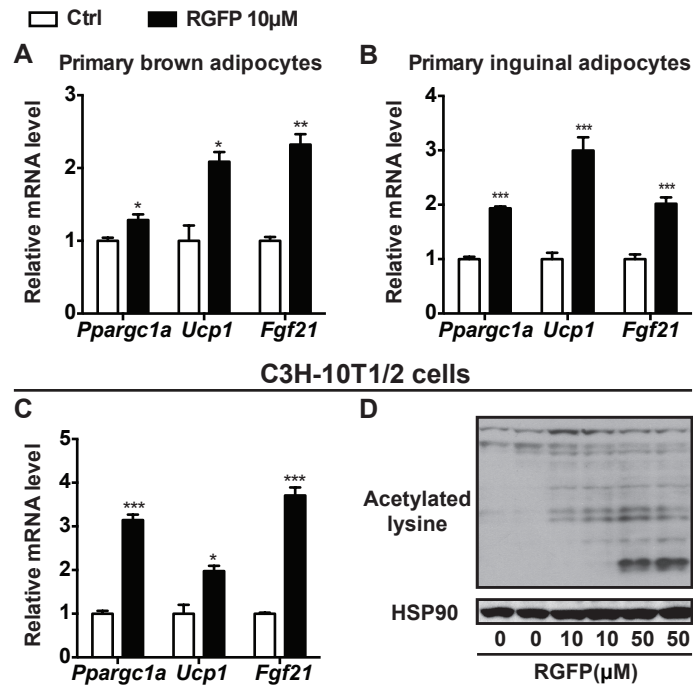

**Supplemental Figure 3:** Pharmacological inhibition of HDAC3 increases thermogenic gene expression and acetylated lysine in adipocytes. (A-C) Real-time qPCR analyses of thermogenic markers after treatment with vehicle control or 10  $\mu$ M RGFP for 6 h in differentiated primary brown adipocytes (A) and primary inguinal adipocytes (B) isolated from 129SVE mice, and in differentiated C3H-10T1/2 cells (C). (A-C, n=3). (D) Representative immunoblots of acetylated lysine and HSP90 as a loading control in differentiated C3H-10T1/2 cells treated with vehicle control, 10 or 50  $\mu$ M RGFP for 24 h. Data are presented as mean  $\pm$  SEM; \* $P$ <0.05, \*\* $P$ <0.01, \*\*\* $P$ <0.001.

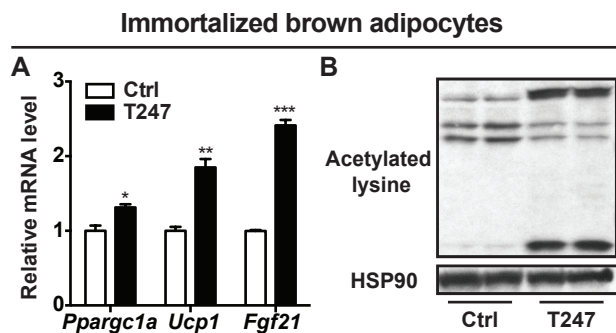

**Supplemental Figure 4:** Selective HDAC3 inhibitor T247 increases thermogenic gene expression and acetylated lysine in adipocytes. Real-time qPCR analyses of thermogenic genes after treatment with vehicle (Ctrl) or 10  $\mu$ M T247 for 6 h (A, n=3), representative immunoblots of acetylated lysine and HSP90 as a loading control after treatment with Ctrl or 10  $\mu$ M T247 for 24 h (B) in immortalized brown adipocytes. Data are presented as mean  $\pm$  SEM; \* $P$ <0.05, \*\* $P$ <0.01, \*\*\* $P$ <0.001.
